# Supplementary material
Source: PubMed Central journal article supplement (PMC6748083)

# Supplementary Figure S1

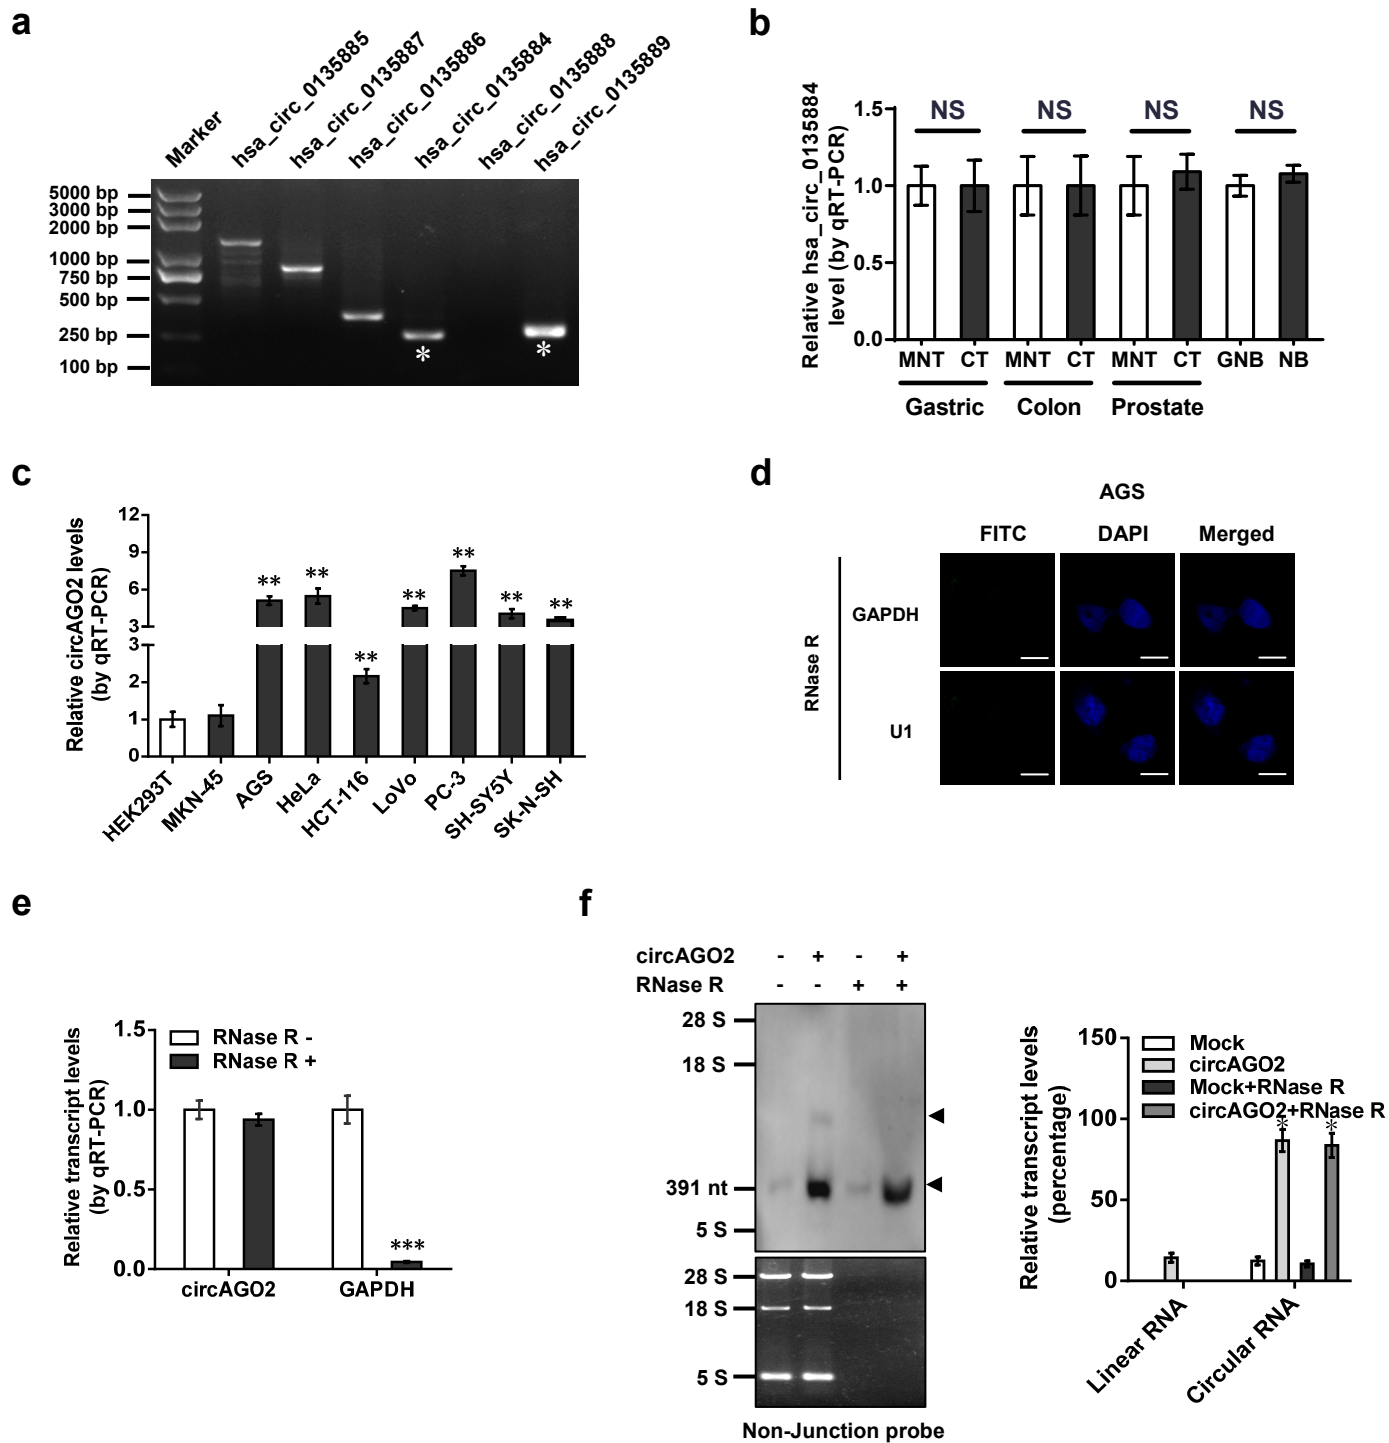

## Supplementary Figure S2

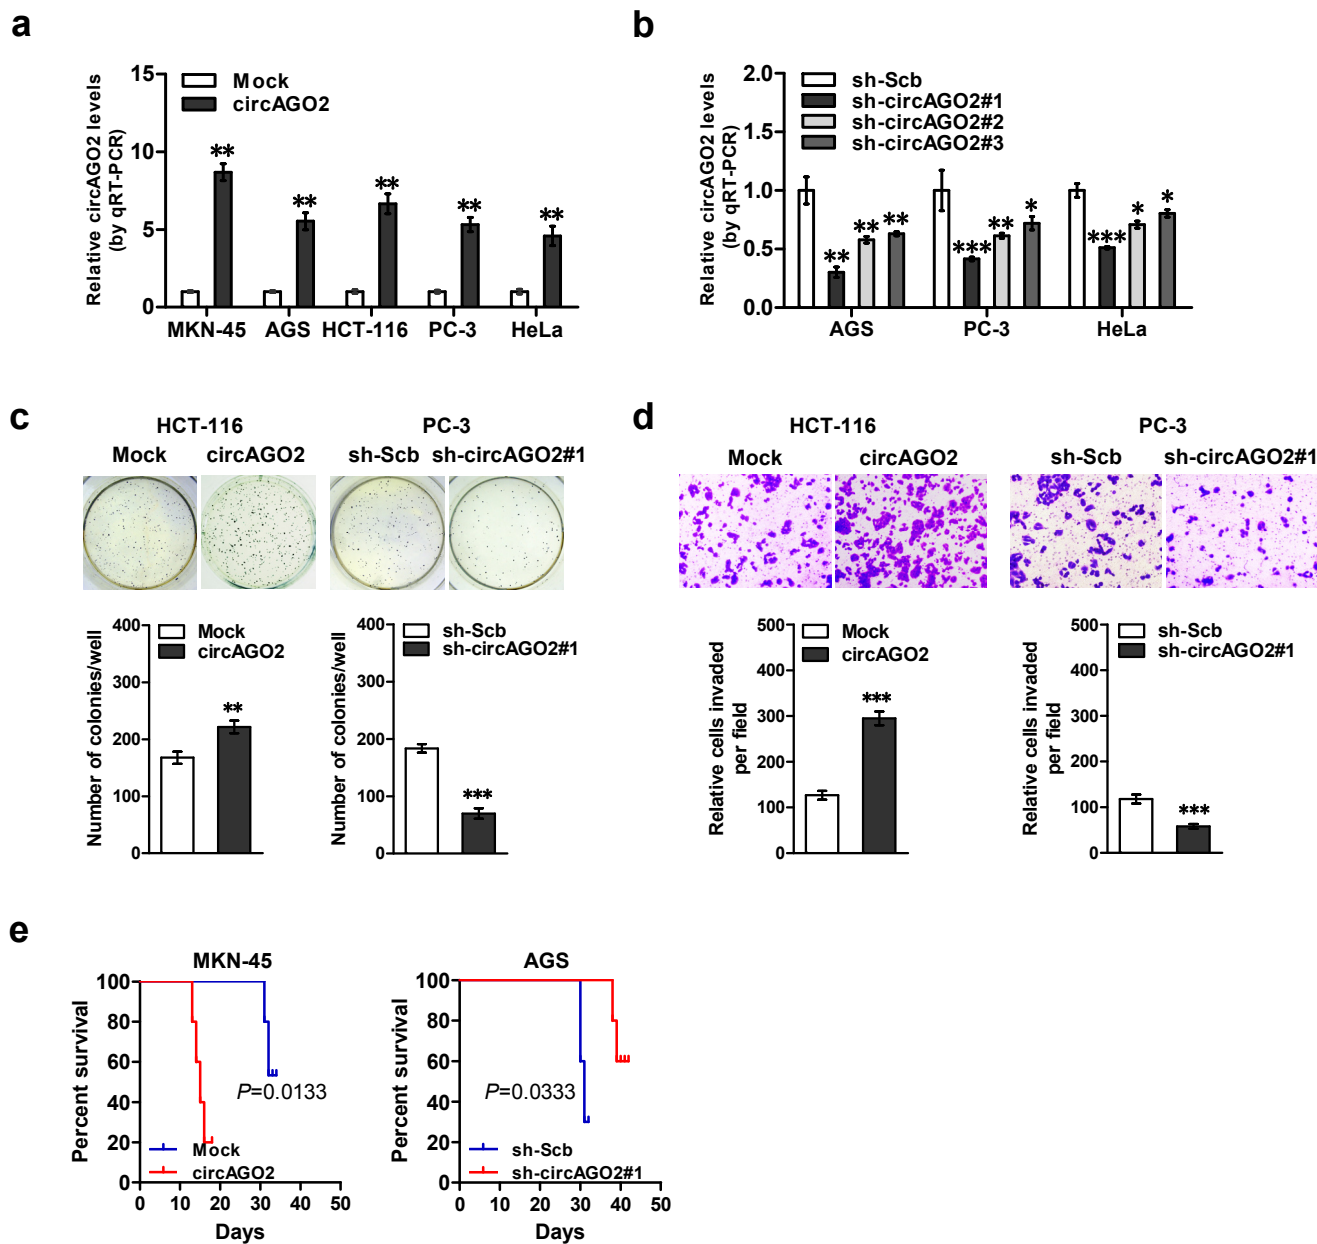

## Supplementary Figure S3

**a**

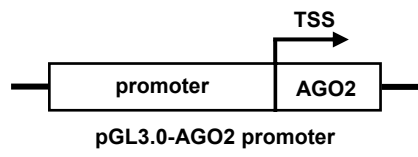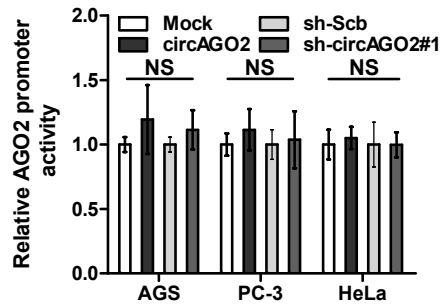

**b**

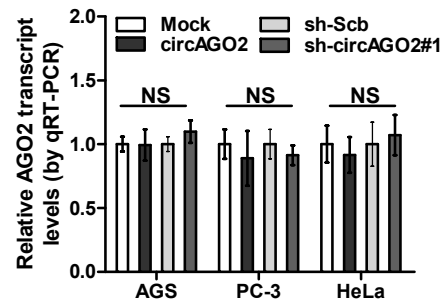

**c**

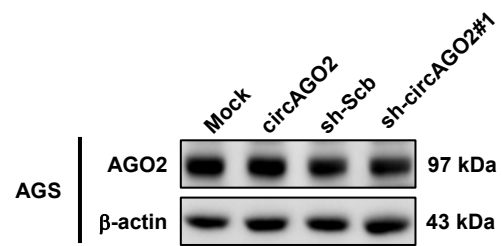

# Supplementary Figure S4

**a**

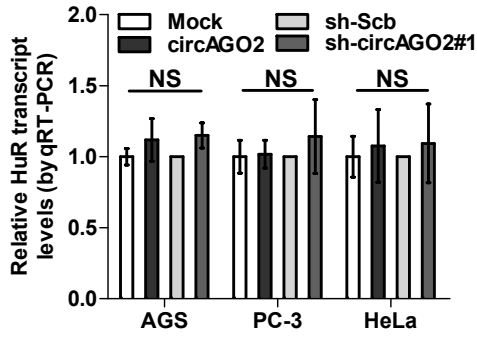

**b**

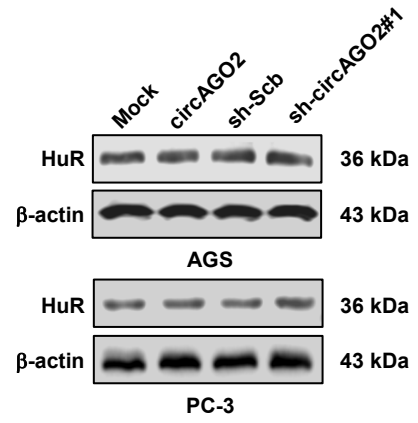

**c**

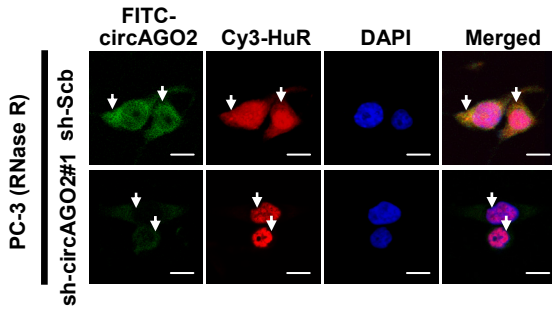

**d**

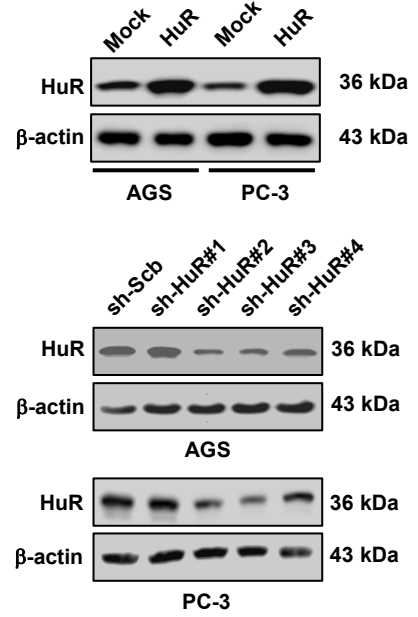

**e**

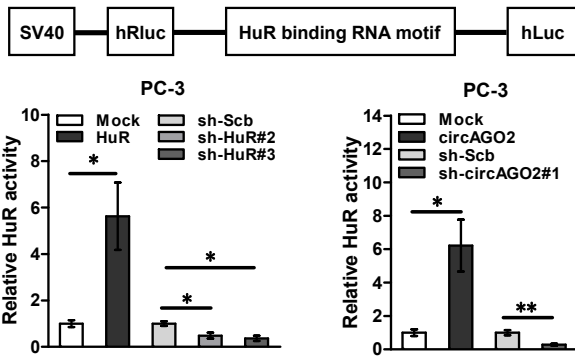

# Supplementary Figure S5

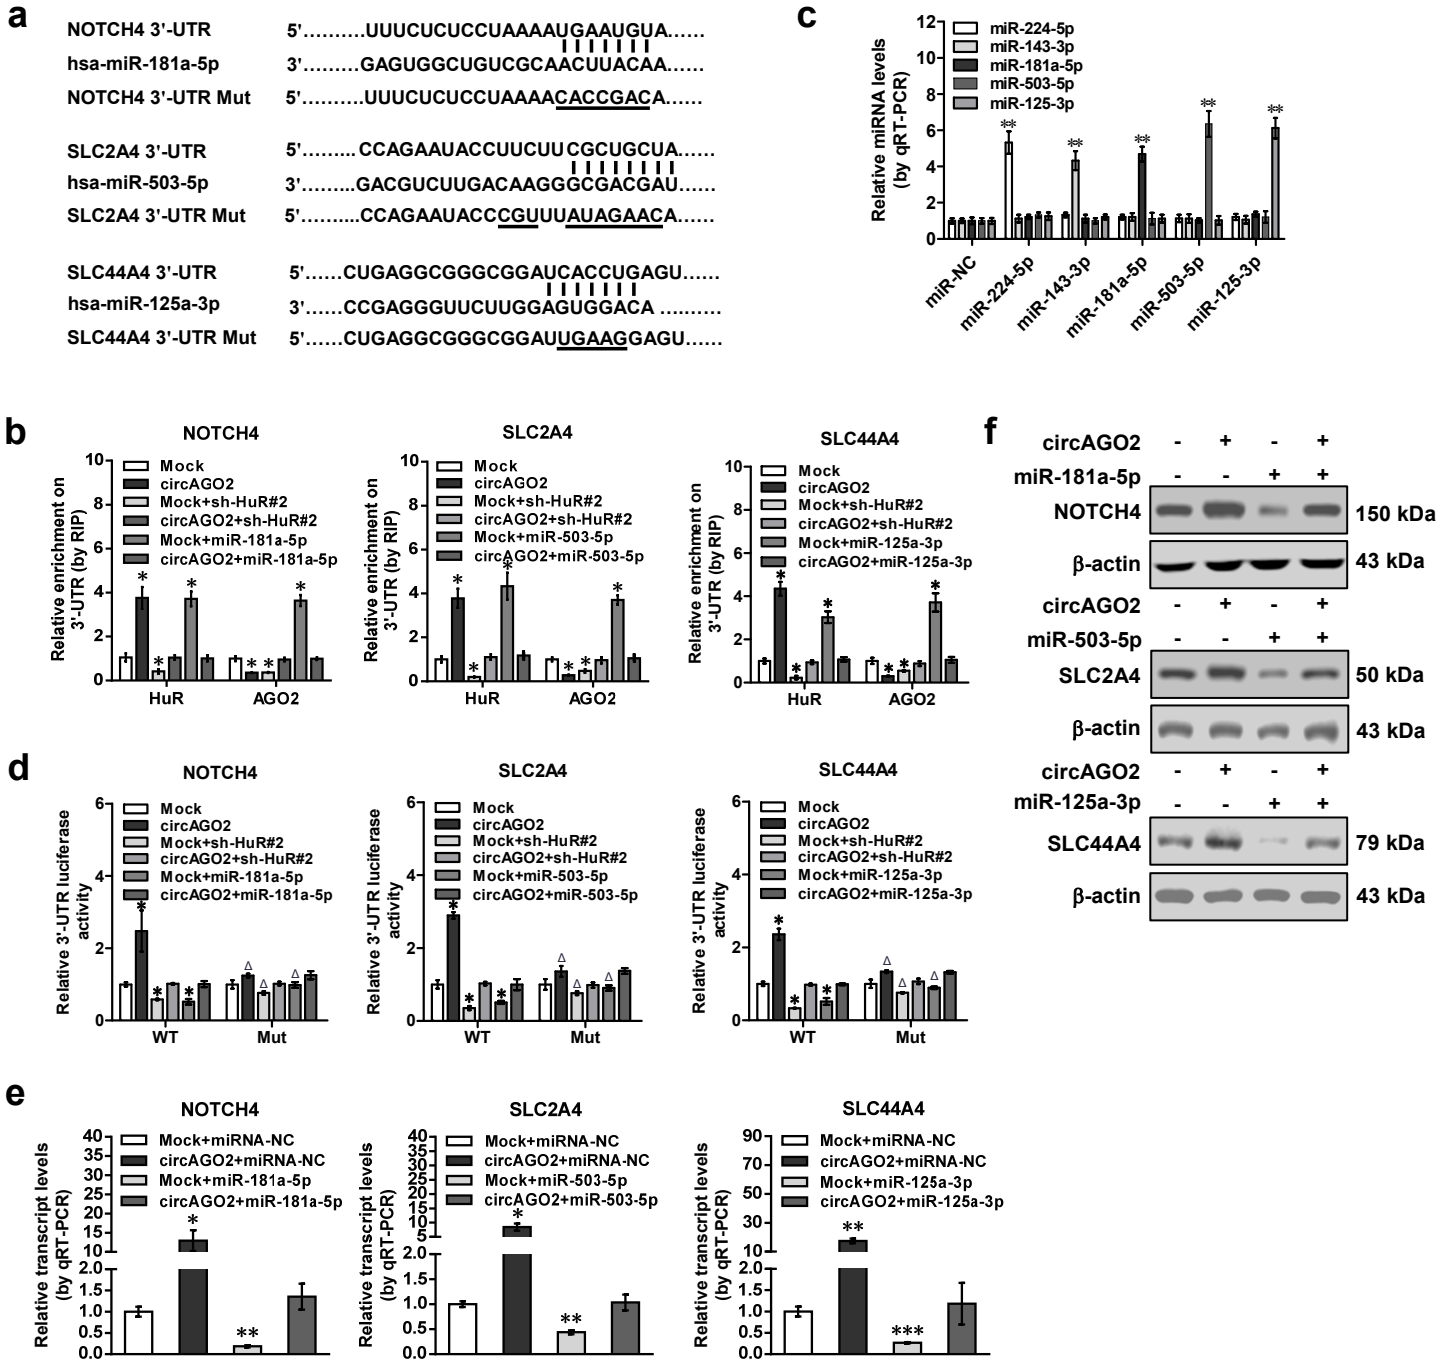

# Supplementary Figure S6

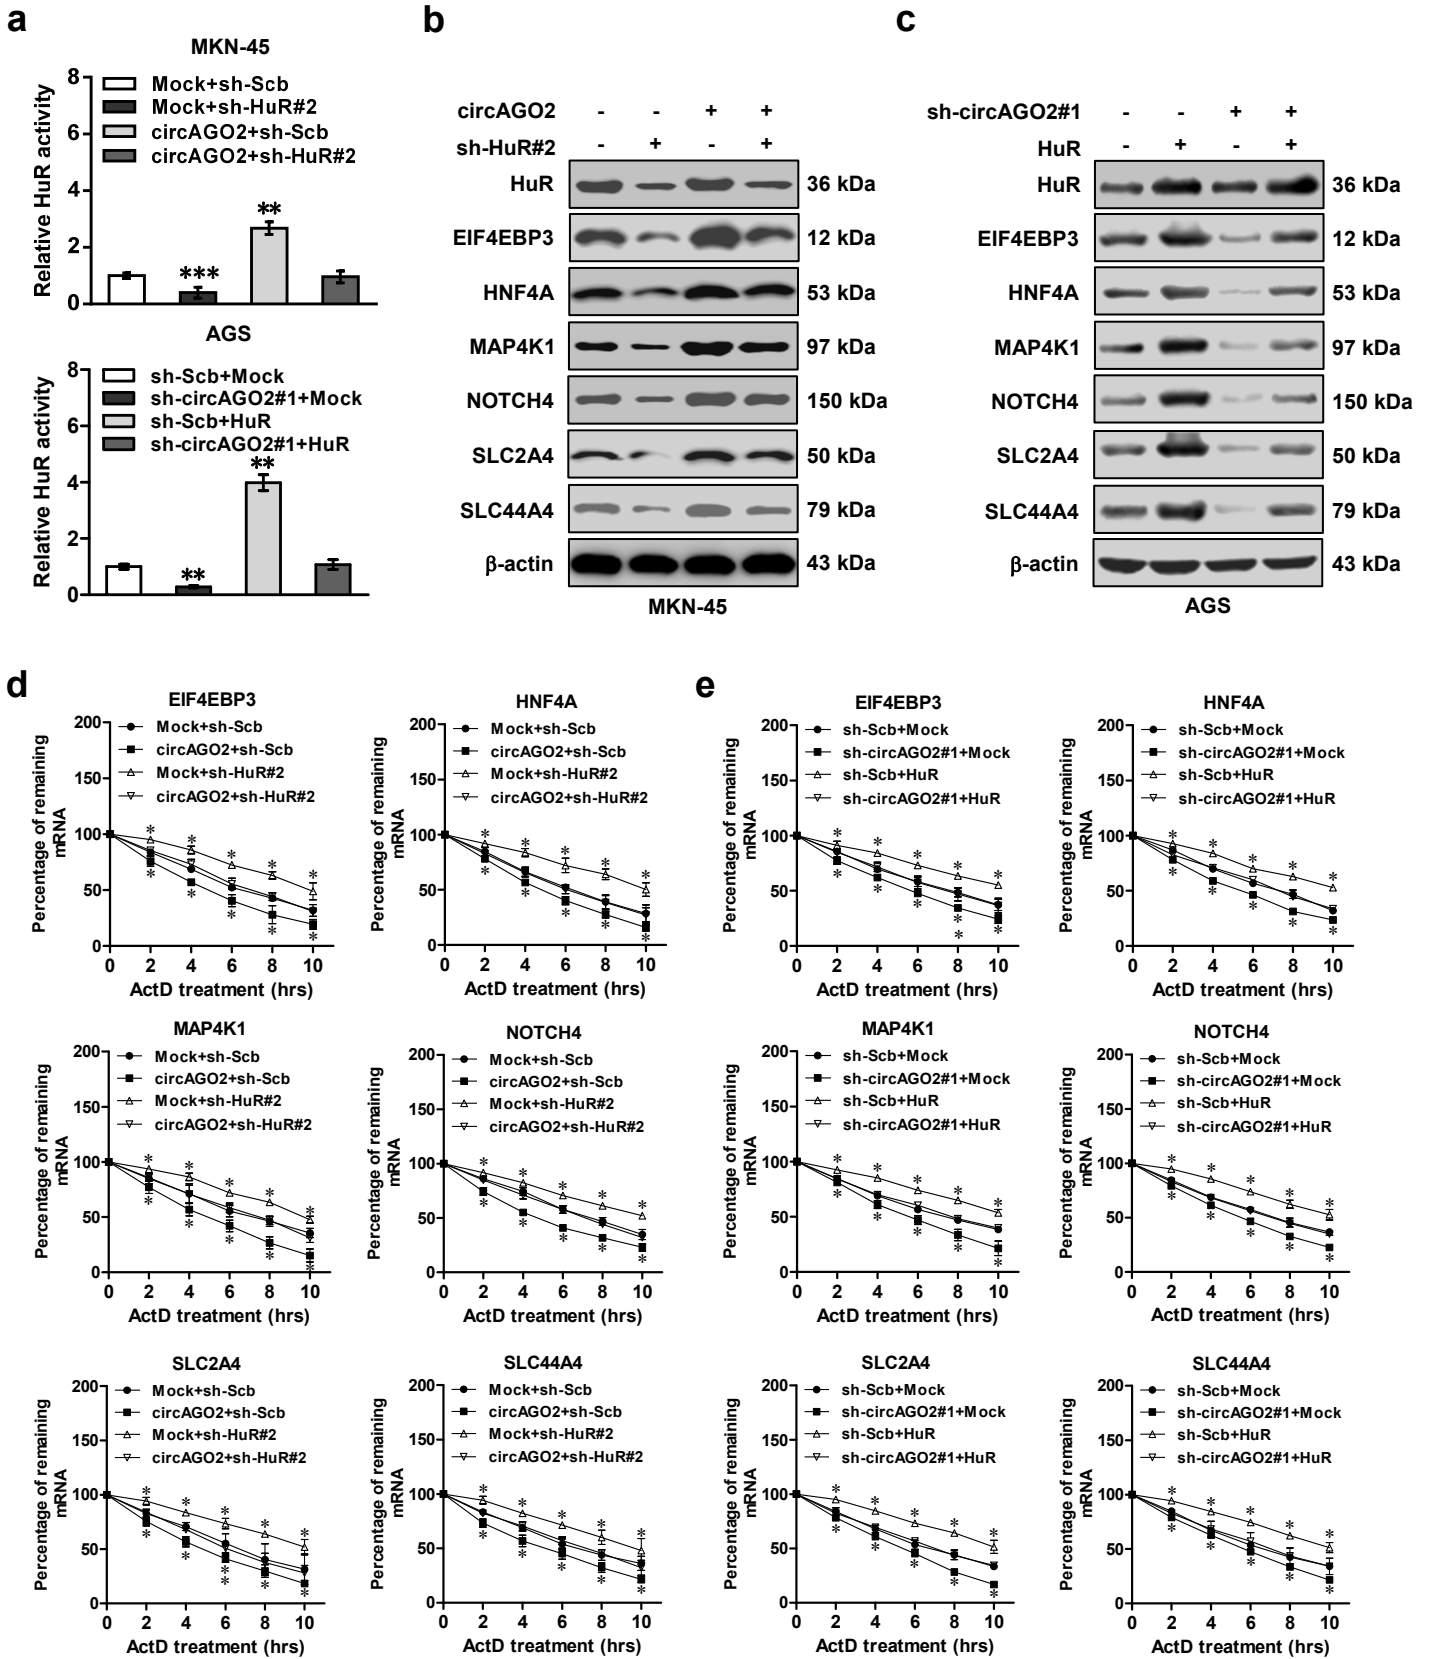

# Supplementary Figure S7

**a**

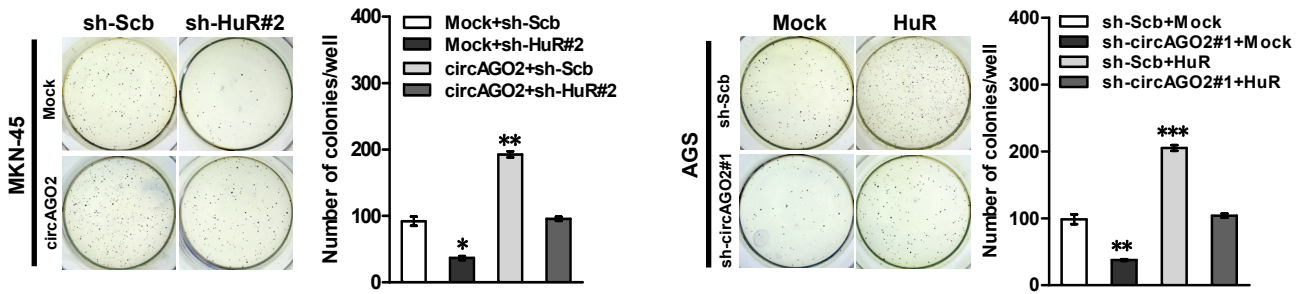

**b**

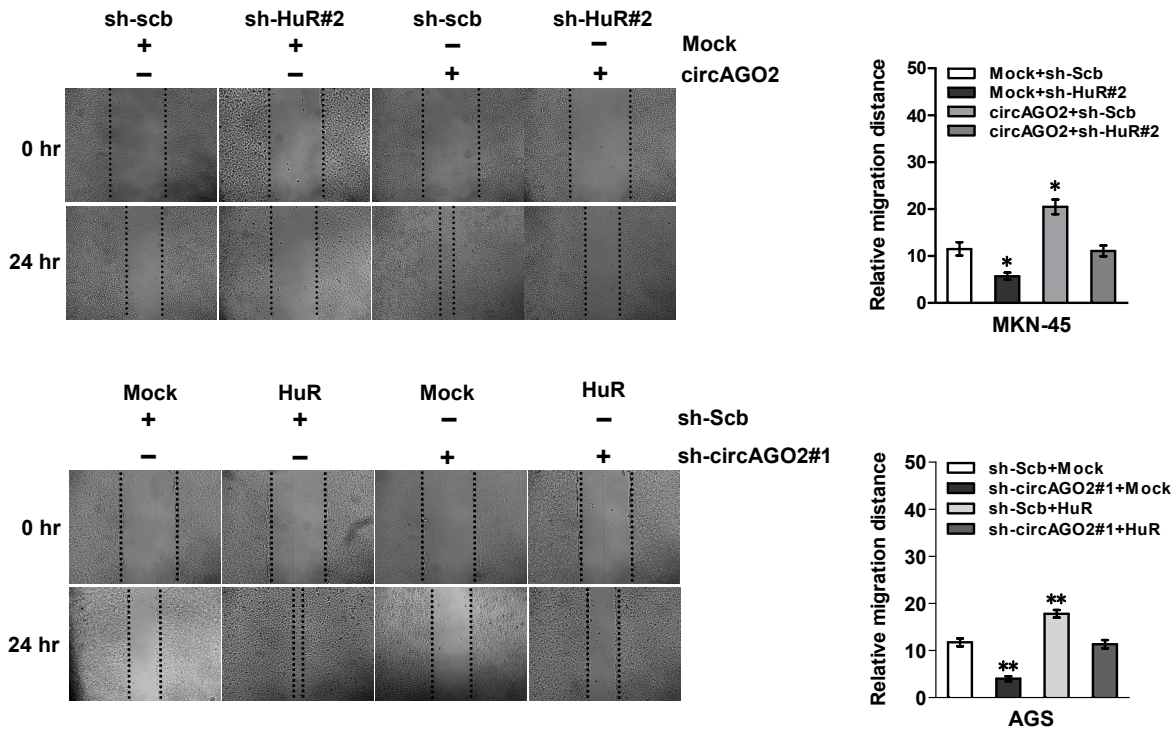

**c**

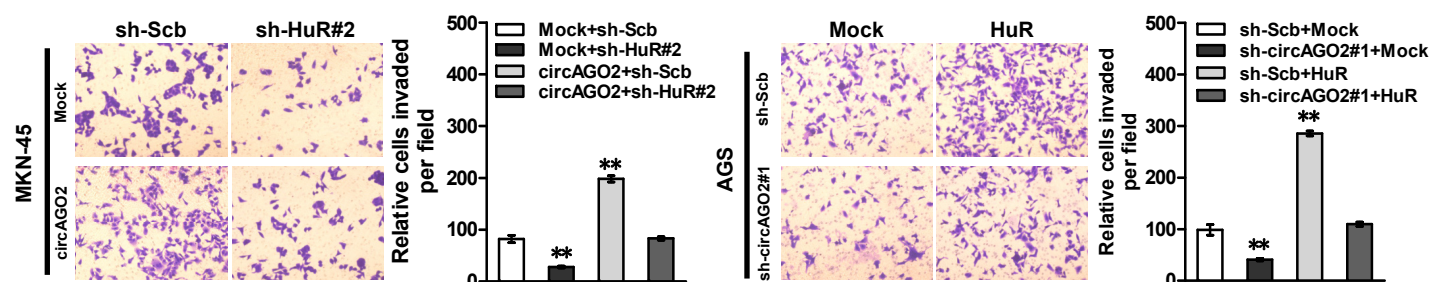

# Supplementary Figure S8

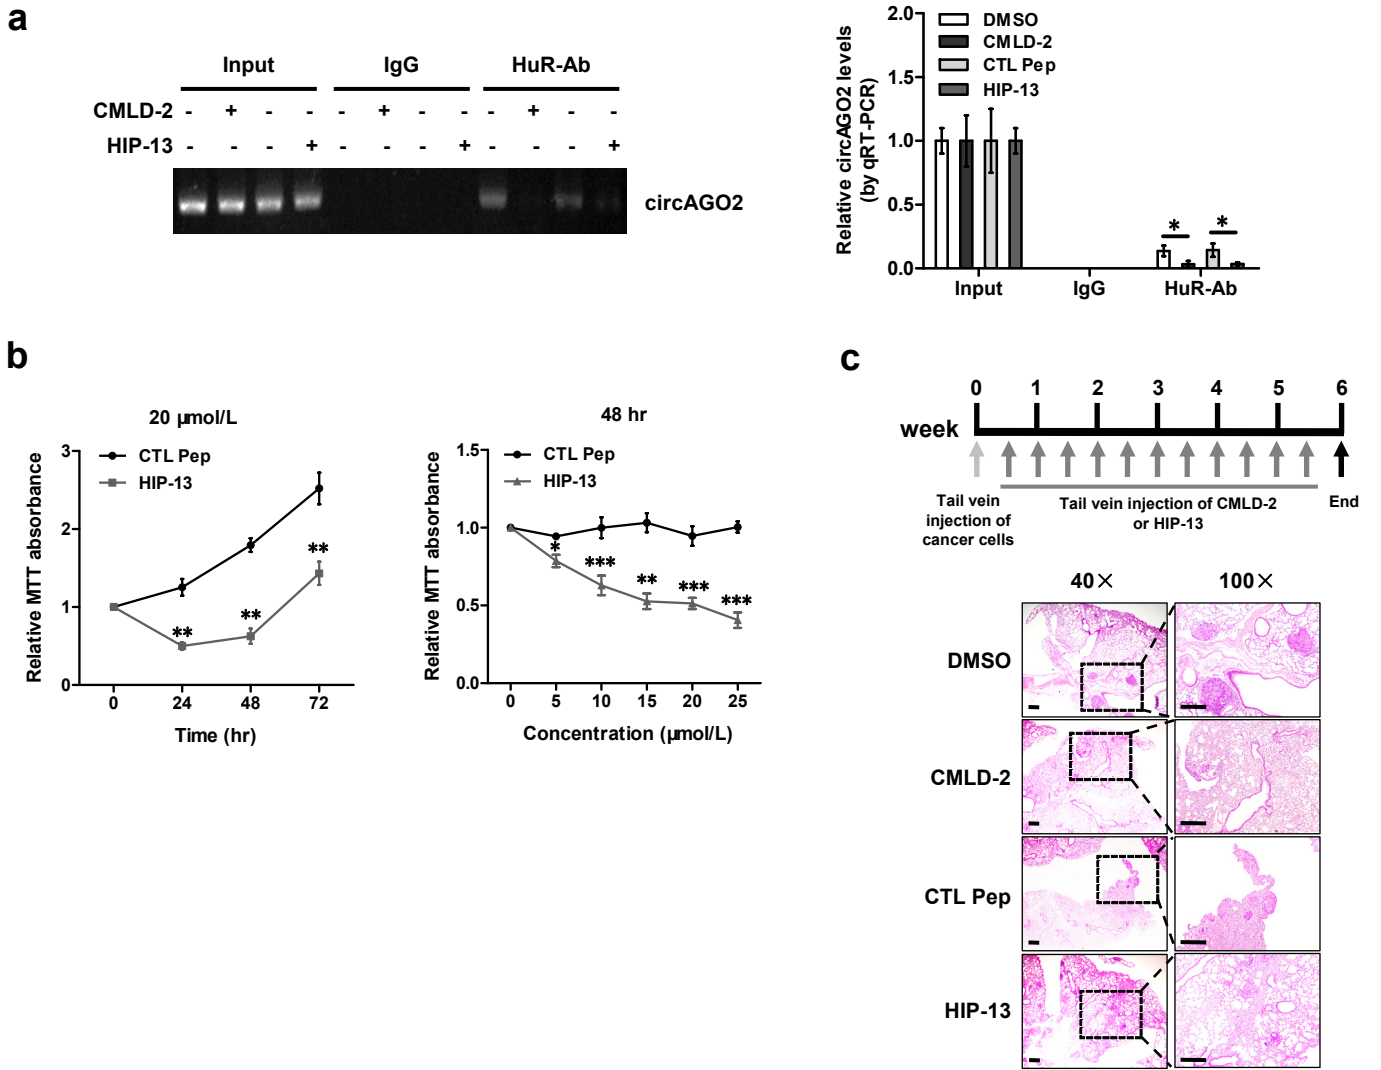



## Supplementary Figure S9

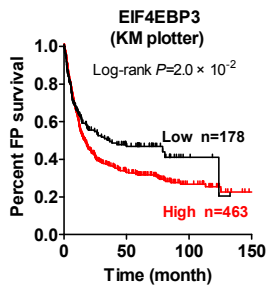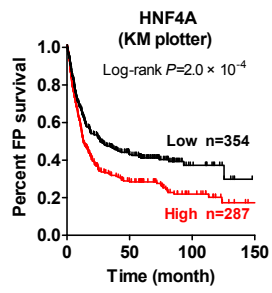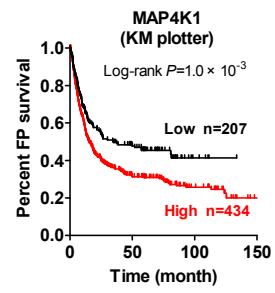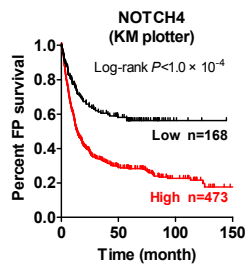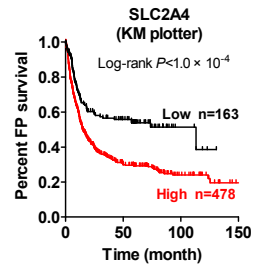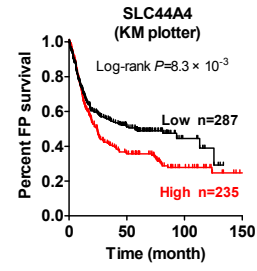

Supplement: 41418_2018_220_MOESM2_ESM.pdf [file 41418_2018_220_MOESM2_ESM.pdf]
